# Supplementary material for: SNAPflex: a paper-and-plastic device for instrument-free RNA and DNA extraction from whole blood
Source: Royal Society of Chemistry journal article supplement (doi:10.1039/d0lc00277a), 2020-01-01
Supplement: d0lc00277a1.pdf [file d0lc00277a1.pdf]

# SNAPflex: a paper-and-plastic device for instrument-free RNA and DNA extraction from whole blood

## Supplementary material

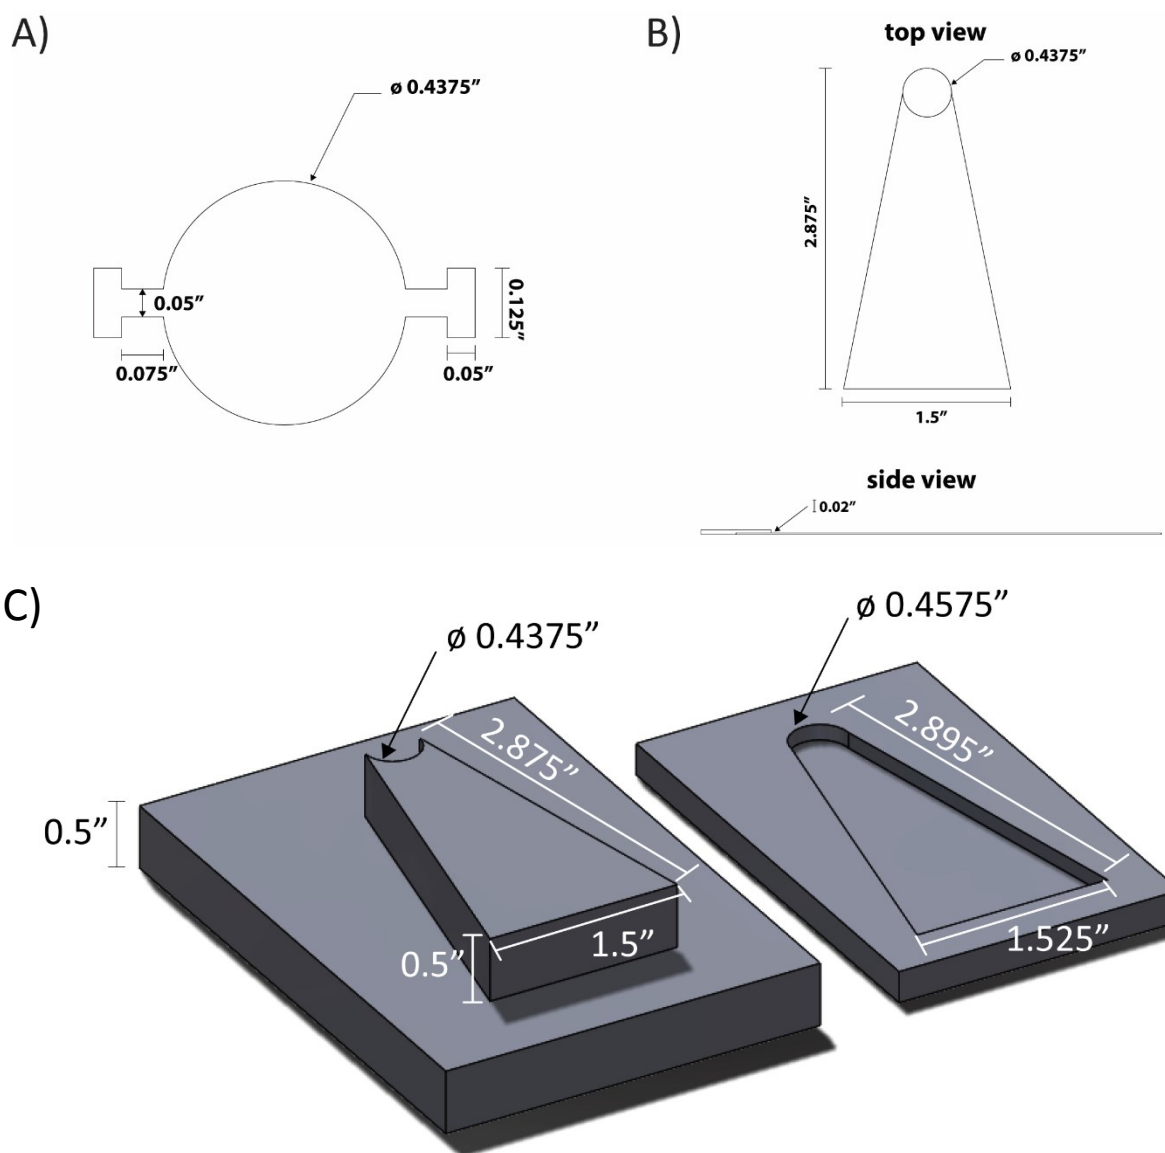

Figure S1: A) Dimensions of glass fiber paper membrane; B) Dimensions of top view and side view of chromatography paper waste pad, C) Dimensions of press used to generate the protrusion in the chromatography paper waste pad. Ahlstrom chromatography paper cut into the appropriate dimensions was placed into the bottom portion of the mold, the top portion of the mold is sealed on top and pressurized to incorporate the protrusion.

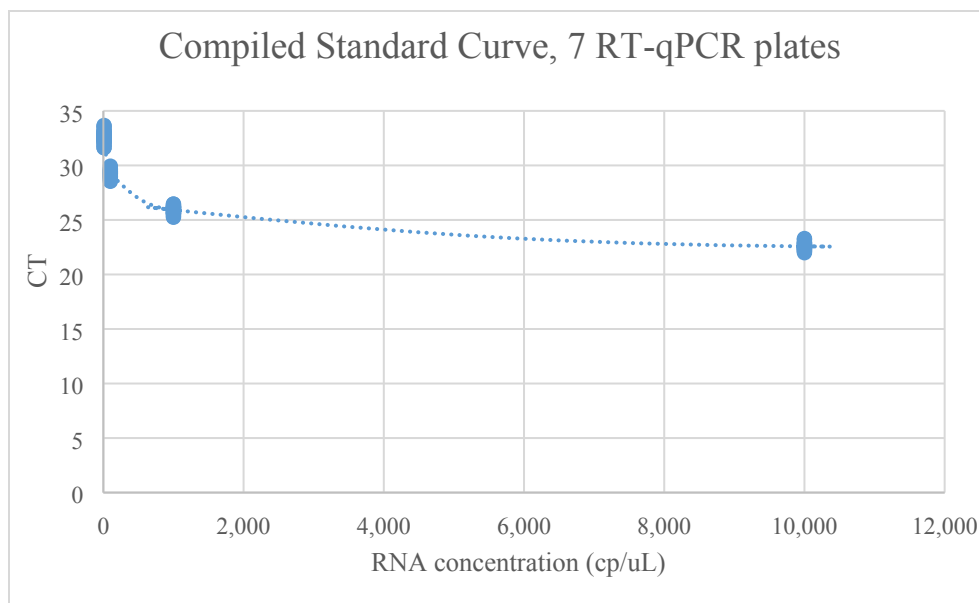

|                       |                                                         |                      |
|-----------------------|---------------------------------------------------------|----------------------|
| Slope                 | -3.34                                                   | standard error, 0.03 |
| Intercept             | 35.9                                                    | standard error, 0.1  |
| R <sup>2</sup>        | 0.99                                                    |                      |
| Calculated Efficiency | 99.21%                                                  |                      |
| Equation of the line: | $C_T = -3.34066 \cdot \log(\text{quantity}) + 35.94307$ |                      |

Figure S2: Compiled standard curve used to analyze all stability samples. RNA stocks went through an unexpected freeze-thaw during storage at -80°C. To avoid variability between quantification due to this error, all samples were quantified by RT-qPCR and the  $C_T$  values were compared against this master standard curve from 9 separate known successful experiments rather than an internal standard curve. The raw  $C_T$  values and the corresponding calculated quantities are included in Table S1.

Table S1: C<sub>T</sub> values and calculated quantities using “master” standard curve for RNA stability.

| Experiment Replicate | Day | Temperature | CT    | Ct Mean | Ct SD | Calculated Quantity (copies/ $\mu$ L) | Calculated Quantity (copies/mL) | Mean Quantity (copies/mL) | Quantity Standard Dev (copies/mL) | Recovery |
|----------------------|-----|-------------|-------|---------|-------|---------------------------------------|---------------------------------|---------------------------|-----------------------------------|----------|
| 1                    | 0   | Room Temp   | 29.90 | 29.81   | 0.12  | 64.32                                 | 64322.89                        | 68876.66                  | 5816.98                           | 68.88%   |
| 1                    | 0   | Room Temp   | 29.85 | 29.81   | 0.12  | 66.88                                 | 66877.48                        |                           |                                   |          |
| 1                    | 0   | Room Temp   | 29.67 | 29.81   | 0.12  | 75.43                                 | 75429.60                        |                           |                                   |          |
| 1                    | 0   | Room Temp   | 29.92 | 30.08   | 0.21  | 63.62                                 | 63615.88                        | 57440.56                  | 7836.59                           | 57.44%   |
| 1                    | 0   | Room Temp   | 30.31 | 30.08   | 0.21  | 48.62                                 | 48624.79                        |                           |                                   |          |
| 1                    | 0   | Room Temp   | 30.00 | 30.08   | 0.21  | 60.08                                 | 60081.01                        |                           |                                   |          |
| 1                    | 1   | Room Temp   | 29.70 | 29.54   | 0.16  | 74.32                                 | 74319.28                        | 83027.16                  | 9026.64                           | 83.03%   |
| 1                    | 1   | Room Temp   | 29.38 | 29.54   | 0.16  | 92.34                                 | 92341.93                        |                           |                                   |          |
| 1                    | 1   | Room Temp   | 29.54 | 29.54   | 0.16  | 82.42                                 | 82420.28                        |                           |                                   |          |
| 1                    | 1   | Room Temp   | 30.02 | 30.02   | 0.05  | 59.36                                 | 59364.26                        | 59447.53                  | 1973.74                           | 59.45%   |
| 1                    | 1   | Room Temp   | 29.97 | 30.02   | 0.05  | 61.46                                 | 61461.60                        |                           |                                   |          |
| 1                    | 1   | Room Temp   | 30.06 | 30.02   | 0.05  | 57.52                                 | 57516.74                        |                           |                                   |          |
| 1                    | 7   | Room Temp   | 29.74 | 29.79   | 0.07  | 71.80                                 | 71800.64                        | 69595.71                  | 3423.03                           | 69.60%   |
| 1                    | 7   | Room Temp   | 29.75 | 29.79   | 0.07  | 71.33                                 | 71334.16                        |                           |                                   |          |
| 1                    | 7   | Room Temp   | 29.87 | 29.79   | 0.07  | 65.65                                 | 65652.32                        |                           |                                   |          |
| 1                    | 7   | Room Temp   | 29.71 | 29.65   | 0.09  | 73.60                                 | 73602.77                        | 76407.36                  | 5008.68                           | 76.41%   |
| 1                    | 7   | Room Temp   | 29.55 | 29.65   | 0.09  | 82.19                                 | 82190.02                        |                           |                                   |          |
| 1                    | 7   | Room Temp   | 29.71 | 29.65   | 0.09  | 73.43                                 | 73429.29                        |                           |                                   |          |
| 1                    | 14  | Room Temp   | 29.43 | 29.63   | 0.19  | 89.30                                 | 89300.17                        | 78241.95                  | 10491.79                          | 78.24%   |
| 1                    | 14  | Room Temp   | 29.64 | 29.63   | 0.19  | 77.00                                 | 76998.20                        |                           |                                   |          |
| 1                    | 14  | Room Temp   | 29.81 | 29.63   | 0.19  | 68.43                                 | 68427.46                        |                           |                                   |          |
| 1                    | 14  | Room Temp   | 29.87 | 30.02   | 0.17  | 65.72                                 | 65716.22                        | 59523.63                  | 6738.74                           | 59.52%   |
| 1                    | 14  | Room Temp   | 29.99 | 30.02   | 0.17  | 60.51                                 | 60507.70                        |                           |                                   |          |
| 1                    | 14  | Room Temp   | 30.20 | 30.02   | 0.17  | 52.35                                 | 52346.96                        |                           |                                   |          |
| 1                    | 1   | 37C         | 29.76 | 29.76   | 0.06  | 71.18                                 | 71184.46                        | 70860.22                  | 3024.16                           | 70.86%   |
| 1                    | 1   | 37C         | 29.83 | 29.76   | 0.06  | 67.69                                 | 67687.00                        |                           |                                   |          |
| 1                    | 1   | 37C         | 29.70 | 29.76   | 0.06  | 73.71                                 | 73709.19                        |                           |                                   |          |
| 1                    | 7   | 37C         | 29.74 | 29.69   | 0.07  | 72.12                                 | 72124.86                        | 74435.60                  | 3663.21                           | 74.44%   |
| 1                    | 7   | 37C         | 29.73 | 29.69   | 0.07  | 72.52                                 | 72522.68                        |                           |                                   |          |
| 1                    | 7   | 37C         | 29.61 | 29.69   | 0.07  | 78.66                                 | 78659.28                        |                           |                                   |          |
| 1                    | 14  | 37C         | 29.96 | 29.91   | 0.06  | 61.65                                 | 61645.86                        | 64120.02                  | 2498.01                           | 64.12%   |
| 1                    | 14  | 37C         | 29.91 | 29.91   | 0.06  | 64.07                                 | 64072.99                        |                           |                                   |          |
| 1                    | 14  | 37C         | 29.85 | 29.91   | 0.06  | 66.64                                 | 66641.22                        |                           |                                   |          |
| 1                    | 14  | 37C         | 29.88 | 29.97   | 0.23  | 65.14                                 | 65144.89                        | 61735.44                  | 9182.39                           | 61.74%   |
| 1                    | 14  | 37C         | 30.23 | 29.97   | 0.23  | 51.34                                 | 51335.99                        |                           |                                   |          |
| 1                    | 14  | 37C         | 29.81 | 29.97   | 0.23  | 68.73                                 | 68725.42                        |                           |                                   |          |

|   |    |           |       |       |      |             |             |             |             |         |
|---|----|-----------|-------|-------|------|-------------|-------------|-------------|-------------|---------|
| 2 | 0  | Room Temp | 29.19 | 29.15 | 0.04 | 105.2891765 | 105289.1765 | 108420.6576 | 2720.810228 | 108.42% |
| 2 | 0  | Room Temp | 29.13 | 29.15 | 0.04 | 109.7669037 | 109766.9037 |             |             |         |
| 2 | 0  | Room Temp | 29.12 | 29.15 | 0.04 | 110.2058927 | 110205.8927 |             |             |         |
| 2 | 0  | Room Temp | 29.58 | 29.64 | 0.06 | 80.5028448  | 80502.8448  | 77274.89201 | 3234.910573 | 77.27%  |
| 2 | 0  | Room Temp | 29.70 | 29.64 | 0.06 | 74.03306826 | 74033.06826 |             |             |         |
| 2 | 0  | Room Temp | 29.64 | 29.64 | 0.06 | 77.28876297 | 77288.76297 |             |             |         |
| 2 | 1  | Room Temp | 29.45 | 29.40 | 0.12 | 88.0532572  | 88053.2572  | 91287.32589 | 7743.354429 | 91.29%  |
| 2 | 1  | Room Temp | 29.26 | 29.40 | 0.12 | 100.1234417 | 100123.4417 |             |             |         |
| 2 | 1  | Room Temp | 29.49 | 29.40 | 0.12 | 85.68527875 | 85685.27875 |             |             |         |
| 2 | 1  | Room Temp | 29.16 | 29.19 | 0.06 | 107.0832574 | 107083.2574 | 105459.5297 | 4129.022574 | 105.46% |
| 2 | 1  | Room Temp | 29.25 | 29.19 | 0.06 | 100.7654682 | 100765.4682 |             |             |         |
| 2 | 1  | Room Temp | 29.14 | 29.19 | 0.06 | 108.5298635 | 108529.8635 |             |             |         |
| 2 | 7  | Room Temp | 29.33 | 29.48 | 0.13 | 95.13582733 | 95135.82733 | 86359.01247 | 7604.565864 | 86.36%  |
| 2 | 7  | Room Temp | 29.55 | 29.48 | 0.13 | 82.2052594  | 82205.2594  |             |             |         |
| 2 | 7  | Room Temp | 29.55 | 29.48 | 0.13 | 81.73595069 | 81735.95069 |             |             |         |
| 2 | 7  | Room Temp | 29.38 | 29.47 | 0.09 | 92.01086714 | 92010.86714 | 86707.25003 | 5093.612183 | 86.71%  |
| 2 | 7  | Room Temp | 29.55 | 29.47 | 0.09 | 81.85348343 | 81853.48343 |             |             |         |
| 2 | 7  | Room Temp | 29.48 | 29.47 | 0.09 | 86.25739953 | 86257.39953 |             |             |         |
| 2 | 14 | Room Temp | 30.28 | 30.33 | 0.05 | 49.43201598 | 49432.01598 | 47992.24683 | 1618.441562 | 47.99%  |
| 2 | 14 | Room Temp | 30.38 | 30.33 | 0.05 | 46.24054265 | 46240.54265 |             |             |         |
| 2 | 14 | Room Temp | 30.32 | 30.33 | 0.05 | 48.30418185 | 48304.18185 |             |             |         |
| 2 | 14 | Room Temp | 29.78 | 29.82 | 0.14 | 70.14179037 | 70141.79037 | 68150.35386 | 6362.414547 | 68.15%  |
| 2 | 14 | Room Temp | 29.98 | 29.82 | 0.14 | 61.0304251  | 61030.4251  |             |             |         |
| 2 | 14 | Room Temp | 29.71 | 29.82 | 0.14 | 73.27884611 | 73278.84611 |             |             |         |
| 2 | 1  | 37C       | 29.66 | 29.57 | 0.11 | 75.833681   | 75833.681   | 81022.40057 | 6213.987377 | 81.02%  |
| 2 | 1  | 37C       | 29.45 | 29.57 | 0.11 | 87.90879146 | 87908.79146 |             |             |         |
| 2 | 1  | 37C       | 29.60 | 29.57 | 0.11 | 79.32472924 | 79324.72924 |             |             |         |
| 2 | 1  | 37C       | 29.61 | 29.55 | 0.11 | 78.54922269 | 78549.22269 | 82304.68607 | 6226.176965 | 82.30%  |
| 2 | 1  | 37C       | 29.42 | 29.55 | 0.11 | 89.4916221  | 89491.6221  |             |             |         |
| 2 | 1  | 37C       | 29.61 | 29.55 | 0.11 | 78.87321342 | 78873.21342 |             |             |         |
| 2 | 7  | 37C       | 29.58 | 29.63 | 0.08 | 80.51903901 | 80519.03901 | 77680.22897 | 4248.532962 | 77.68%  |
| 2 | 7  | 37C       | 29.59 | 29.63 | 0.08 | 79.72577712 | 79725.77712 |             |             |         |
| 2 | 7  | 37C       | 29.72 | 29.63 | 0.08 | 72.79587078 | 72795.87078 |             |             |         |
| 2 | 7  | 37C       | 29.65 | 29.71 | 0.05 | 76.55268257 | 76552.68257 | 73602.71211 | 2564.760576 | 73.60%  |
| 2 | 7  | 37C       | 29.73 | 29.71 | 0.05 | 72.35411712 | 72354.11712 |             |             |         |
| 2 | 7  | 37C       | 29.74 | 29.71 | 0.05 | 71.90133665 | 71901.33665 |             |             |         |
| 2 | 14 | 37C       | 29.56 | 29.48 | 0.10 | 81.53890123 | 81538.90123 | 85978.60409 | 5819.688813 | 85.98%  |
| 2 | 14 | 37C       | 29.37 | 29.48 | 0.10 | 92.56715747 | 92567.15747 |             |             |         |
| 2 | 14 | 37C       | 29.52 | 29.48 | 0.10 | 83.82975357 | 83829.75357 |             |             |         |
| 2 | 14 | 37C       | 29.93 | 29.97 | 0.12 | 63.01134624 | 63011.34624 | 61488.83167 | 4800.839438 | 61.49%  |
| 2 | 14 | 37C       | 30.10 | 29.97 | 0.12 | 56.11135067 | 56111.35067 |             |             |         |

|   |    |           |       |       |      |             |             |             |             |        |
|---|----|-----------|-------|-------|------|-------------|-------------|-------------|-------------|--------|
| 2 | 14 | 37C       | 29.88 | 29.97 | 0.12 | 65.34379809 | 65343.79809 |             |             |        |
| 3 | 0  | Room Temp | 29.15 | 29.37 | 0.21 | 108.0861824 | 108086.1824 | 93259.56812 | 13685.7533  | 93.26% |
| 3 | 0  | Room Temp | 29.57 | 29.37 | 0.21 | 81.11038983 | 81110.38983 |             |             |        |
| 3 | 0  | Room Temp | 29.41 | 29.37 | 0.21 | 90.58213216 | 90582.13216 |             |             |        |
| 3 | 1  | Room Temp | 29.73 | 29.68 | 0.15 | 72.26732368 | 72267.32368 | 75387.90025 | 8065.65584  | 75.39% |
| 3 | 1  | Room Temp | 29.51 | 29.68 | 0.15 | 84.54761651 | 84547.61651 |             |             |        |
| 3 | 1  | Room Temp | 29.79 | 29.68 | 0.15 | 69.34876057 | 69348.76057 |             |             |        |
| 3 | 1  | Room Temp | 30.39 | 30.32 | 0.16 | 45.91512602 | 45915.12602 | 48537.32191 | 5437.3277   | 48.54% |
| 3 | 1  | Room Temp | 30.42 | 30.32 | 0.16 | 44.90801511 | 44908.01511 |             |             |        |
| 3 | 1  | Room Temp | 30.14 | 30.32 | 0.16 | 54.7888246  | 54788.8246  |             |             |        |
| 3 | 7  | Room Temp | 29.92 | 30.04 | 0.11 | 63.37264276 | 63372.64276 | 58462.75069 | 4608.446356 | 58.46% |
| 3 | 7  | Room Temp | 30.15 | 30.04 | 0.11 | 54.23086974 | 54230.86974 |             |             |        |
| 3 | 7  | Room Temp | 30.06 | 30.04 | 0.11 | 57.78473956 | 57784.73956 |             |             |        |
| 3 | 7  | Room Temp | 29.90 | 29.97 | 0.14 | 64.39489175 | 64394.89175 | 61390.64171 | 5588.614191 | 61.39% |
| 3 | 7  | Room Temp | 30.13 | 29.97 | 0.14 | 54.9424607  | 54942.4607  |             |             |        |
| 3 | 7  | Room Temp | 29.89 | 29.97 | 0.14 | 64.83457269 | 64834.57269 |             |             |        |
| 3 | 14 | Room Temp | 30.26 | 30.12 | 0.14 | 50.36461444 | 50364.61444 | 55422.81974 | 5279.785266 | 55.42% |
| 3 | 14 | Room Temp | 30.13 | 30.12 | 0.14 | 55.00454189 | 55004.54189 |             |             |        |
| 3 | 14 | Room Temp | 29.98 | 30.12 | 0.14 | 60.89930289 | 60899.30289 |             |             |        |
| 3 | 14 | Room Temp | 30.26 | 30.42 | 0.17 | 50.15166351 | 50151.66351 | 45172.89574 | 5310.769715 | 45.17% |
| 3 | 14 | Room Temp | 30.40 | 30.42 | 0.17 | 45.78402448 | 45784.02448 |             |             |        |
| 3 | 14 | Room Temp | 30.61 | 30.42 | 0.17 | 39.58299922 | 39582.99922 |             |             |        |
| 3 | 1  | 37C       | 30.11 | 30.05 | 0.12 | 55.68337012 | 55683.37012 | 58372.10367 | 4974.642586 | 58.37% |
| 3 | 1  | 37C       | 29.91 | 30.05 | 0.12 | 64.11250306 | 64112.50306 |             |             |        |
| 3 | 1  | 37C       | 30.12 | 30.05 | 0.12 | 55.32043783 | 55320.43783 |             |             |        |
| 3 | 1  | 37C       | 29.64 | 29.58 | 0.09 | 77.17159571 | 77171.59571 | 80700.3073  | 5001.993725 | 80.70% |
| 3 | 1  | 37C       | 29.47 | 29.58 | 0.09 | 86.42459834 | 86424.59834 |             |             |        |
| 3 | 1  | 37C       | 29.61 | 29.58 | 0.09 | 78.50472785 | 78504.72785 |             |             |        |
| 3 | 7  | 37C       | 30.16 | 30.37 | 0.19 | 53.89603617 | 53896.03617 | 46735.01869 | 6206.233844 | 46.74% |
| 3 | 7  | 37C       | 30.47 | 30.37 | 0.19 | 43.39369599 | 43393.69599 |             |             |        |
| 3 | 7  | 37C       | 30.49 | 30.37 | 0.19 | 42.9153239  | 42915.3239  |             |             |        |
| 3 | 7  | 37C       | 30.20 | 30.19 | 0.05 | 52.31304161 | 52313.04161 | 52824.38655 | 1839.975585 | 52.82% |
| 3 | 7  | 37C       | 30.23 | 30.19 | 0.05 | 51.2941685  | 51294.1685  |             |             |        |
| 3 | 7  | 37C       | 30.13 | 30.19 | 0.05 | 54.86594952 | 54865.94952 |             |             |        |
| 3 | 14 | 37C       | 29.70 | 29.99 | 0.25 | 73.93026367 | 73930.26367 | 61324.49127 | 11066.35569 | 61.32% |
| 3 | 14 | 37C       | 30.08 | 29.99 | 0.25 | 56.83409091 | 56834.09091 |             |             |        |
| 3 | 14 | 37C       | 30.18 | 29.99 | 0.25 | 53.20911924 | 53209.11924 |             |             |        |
| 3 | 14 | 37C       | 30.46 | 30.63 | 0.23 | 43.74360522 | 43743.60522 | 39364.49139 | 5846.476407 | 39.36% |
| 3 | 14 | 37C       | 30.53 | 30.63 | 0.23 | 41.62451962 | 41624.51962 |             |             |        |
| 3 | 14 | 37C       | 30.88 | 30.63 | 0.23 | 32.72534933 | 32725.34933 |             |             |        |

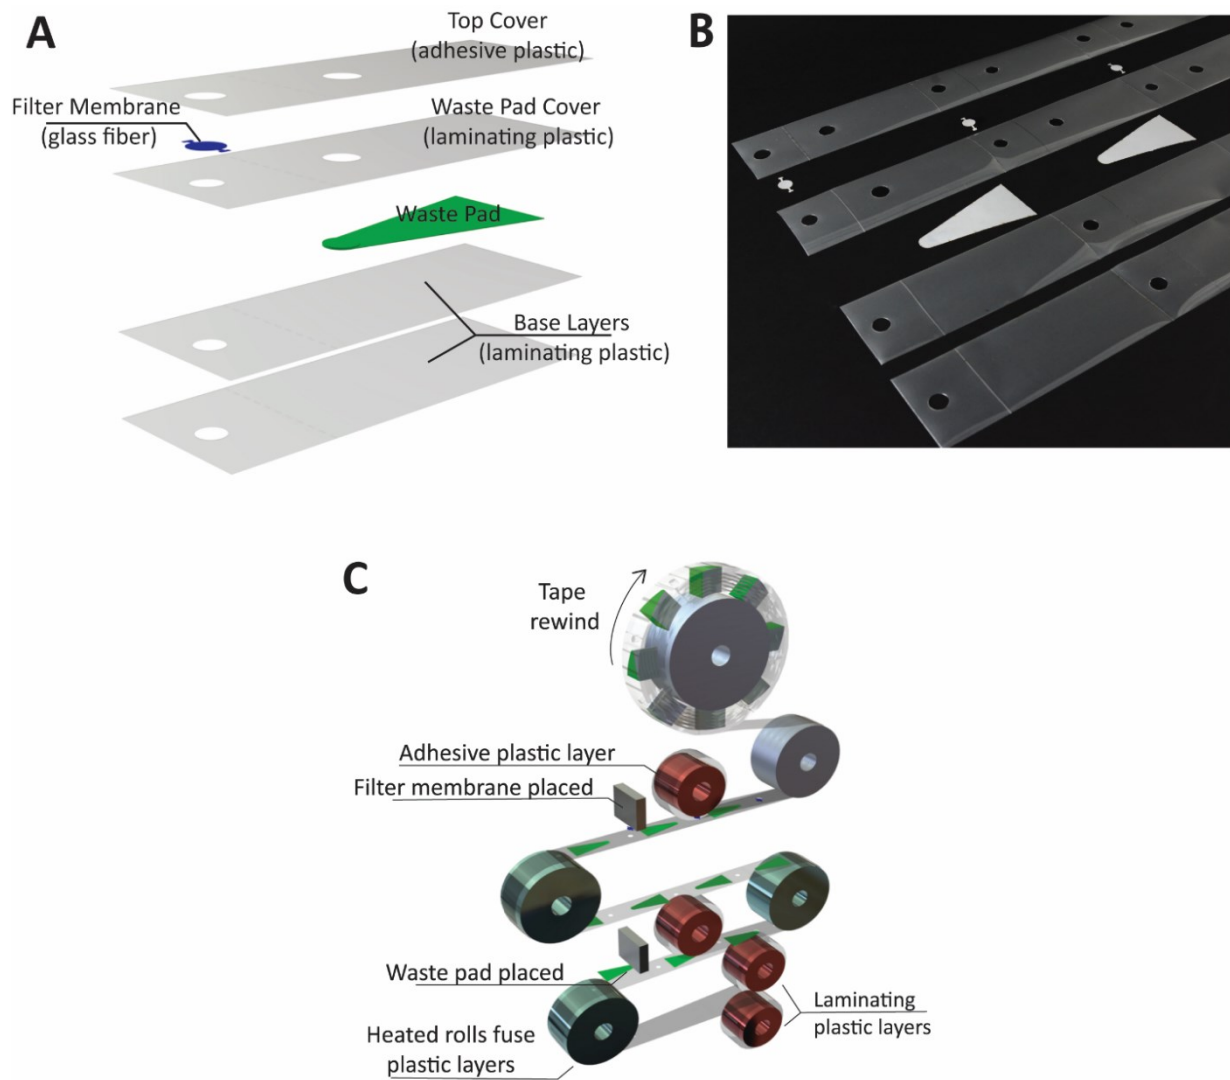

Figure S3: A) SNAPflex layers. (B) All components of the device can be manufactured in configurations suitable for roll-to-roll manufacturing. (C) Proposed roll-to-roll manufacturing schematic.

|              | 1:2 Blood:Lysis Buffer |        |        | 1:1.5 Blood:Lysis Buffer |        |        |
|--------------|------------------------|--------|--------|--------------------------|--------|--------|
| Sample (uL)  | 100                    | 200    | 250    | 100                      | 200    | 250    |
| Total volume | 1133.6                 | 1562.1 | 1776.4 | 1062.1                   | 1419.3 | 1597.9 |

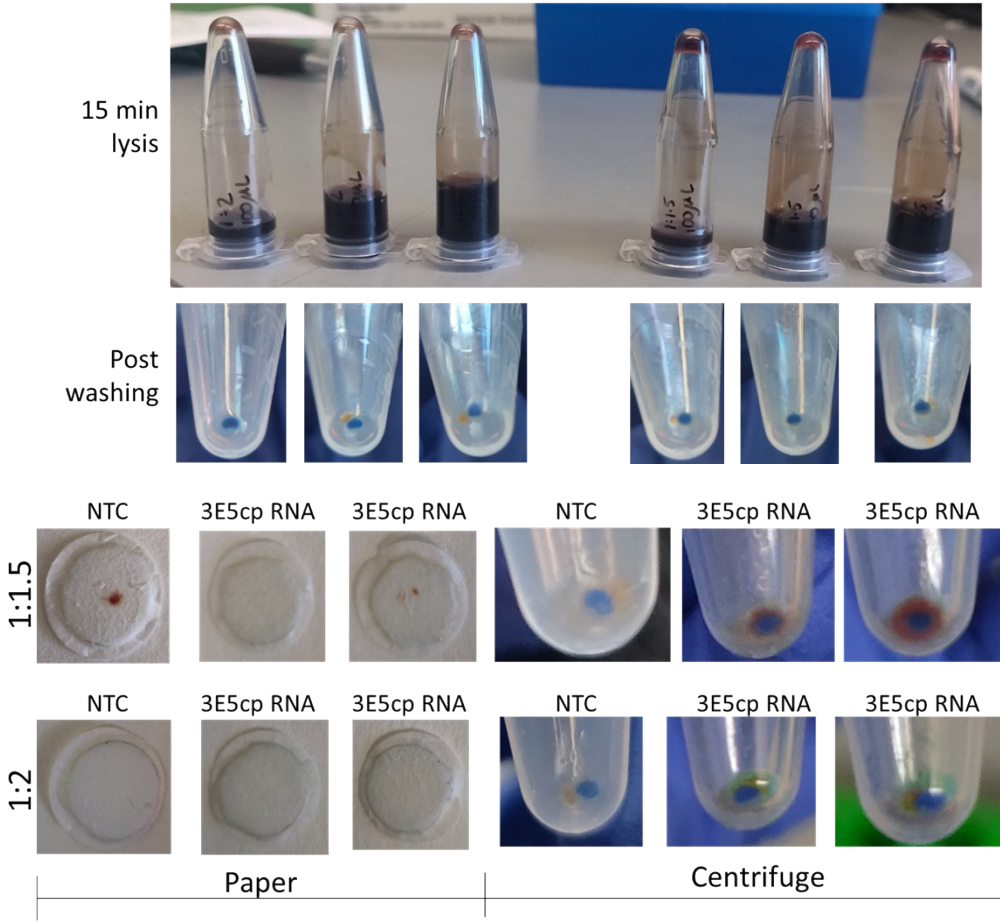

Figure S4: Investigation of sample: lysis buffer ratio. A final ratio of 1:2 (sample :lysis buffer) enabled sufficient lysis of blood components. Complete lysis of whole blood components enabled complete removal of lysed components from the surface of the sample membrane and in centrifugation samples as well.

**A)**

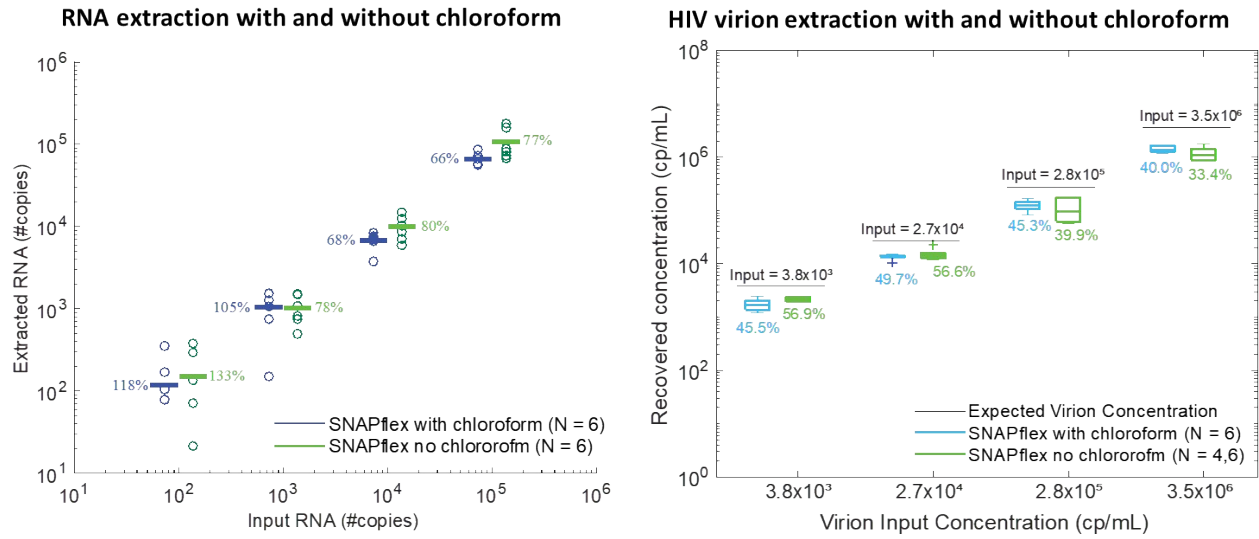

**B)**

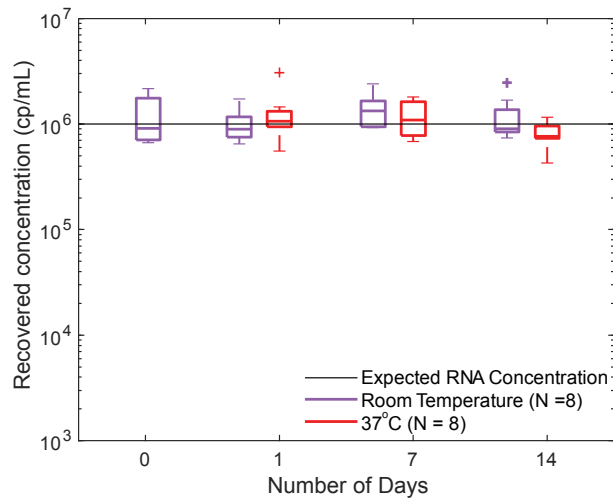

Figure S5: A) Comparison of *in vitro* transcribed RNA recovery and HIV-1 virion RNA recovery with (blue) and without (green) chloroform. B) Recovery of *in vitro* transcribed RNA from whole blood with chloroform included in the precipitation buffer, stabilization at room temperature (purple) and 37°C (red) for 14 days. Including chloroform in the precipitation buffer reduces the necessary volume of precipitation buffer from 35% to 25% but does not significantly change sample recovery.



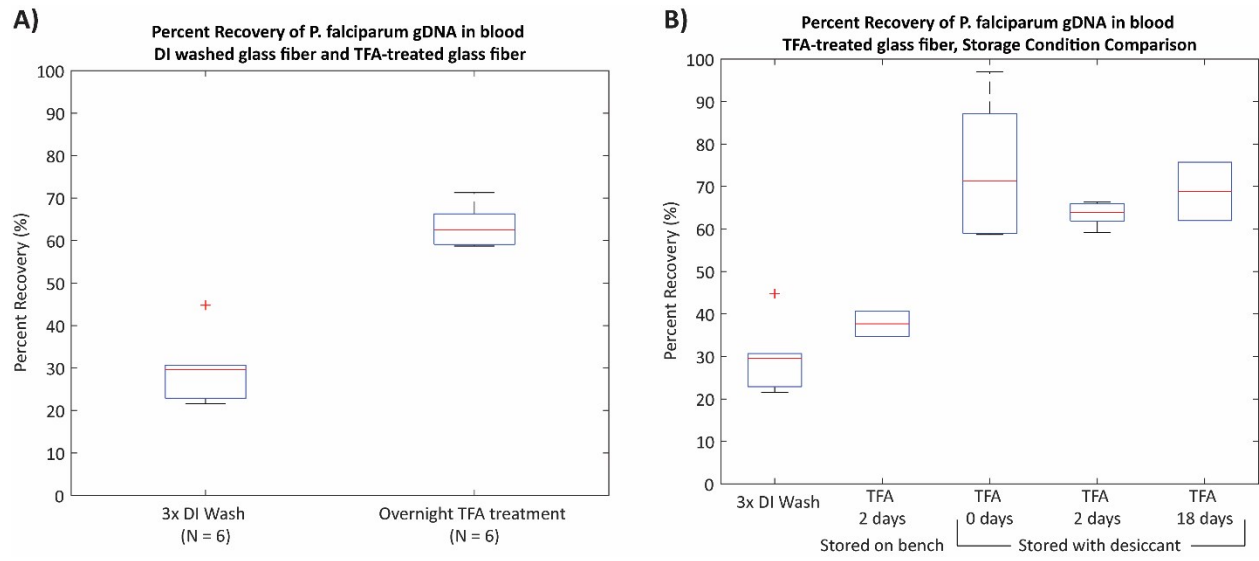

Figure S6: A) Trifluoroacetic acid (TFA) treatment improves DNA recovery from glass fiber membrane, B) TFA-treated membranes must be stored in a dry environment with desiccant is to maintain recovery improved sample recovery.
